# Supplementary material for: Trends in Malaria Epidemiological Factors Following the Implementation of Current Control Strategies in Dangassa, Mali
Source: Research Square preprint supplement (doi:10.21203/rs.3.rs-316826/v1), 2021-03-17
Supplement: Supplementary file 1 [file 6eb0e0a92ab531947fac4fd2.docx]

Authors’ contribution

M.T, conceived of the presented idea and wrote the manuscript with support from M.K. F.K. N.S. J.G.S. S.D. and D.J.K

S.D and D.J.K. encouraged M.T. to investigate the trend’s analysis and supervised the findings of this work. M.T. and F.K. developed the theory and performed the computations.

S.D. N.S. and J.G.S. verified the analytical methods and contributed to the discussion

D.S, S.K, and D.K performed field data collection.

A.Y. lead the data management unit for this research

All authors discussed the results and contributed to the final manuscript.
