# Supplementary material for: Trends in Malaria Epidemiological Factors Following the Implementation of Current Control Strategies in Dangassa, Mali
Source: Research Square preprint supplement (doi:10.21203/rs.3.rs-316826/v1), 2021-03-17
Supplement: Supplementary file 1 [file 34c97c3c9d59dc6b9cebe386.docx]

**List of abbreviations**

ACT: Artemisinin-based Combination Therapies

*An. gambiae s.l: Anopheles gambia senso lato*

AQ: Amodiaquin

CI: Confidence Interval

EIR : Entomological Inoculation Rate

FMOS : Faculté de Médecine et d’Odonto – Stomatologie

FPHA : Faculté de Pharmacie

Hb: Hemoglobin

HBI: Human Biting Index

HBR: Human Biting Rate

HLC: Human Landing Catch

HRP II: Histidine-Rich Protein II

ICEMR-WAF: West African International Center of Excellence for Malaria Research

IPTp: Intermittent Preventive Treatment in pregnancy

IR: Infection Rate

IRS: Insecticide Residual Spraying

ITN: Insecticide-Treated bed Nets

LLIN: Long Lasting Insecticide-Treated bed Nets

MHBR: Mean Human Biting Rate

MoH: Ministry of Health

NMPC: National Malaria Control Program

*P. f :* Plasmodium falciparum

PCD; Passive Case Detection

pLDH: Plasmodium Lactate Dehydrogenase

PSC: Spray Catch

RDT: Rapid Diagnostic Test

SMC: Seasonal Malaria Chemoprevention

SP: Sulfadoxine-Pyrimethamine

SSA: Sub-Saharan Africa

USTTB : Université des Sciences, des Techniques et des Technologies de Bamako

WBC: White Blood Cells

X2: Chi Square
