# Supplementary material for: Trends in Malaria Epidemiological Factors Following the Implementation of Current Control Strategies in Dangassa, Mali
Source: Research Square preprint supplement (doi:10.21203/rs.3.rs-316826/v1), 2021-03-17
Supplement: Supplementary file 3 [file ba98596fbcd5998a3277c122.docx]

**References**

1. WHO: **World malaria report 2020: 20 years of global progress and challenges.** 2020.

2. Wagman J, Cisse I, Kone D, Fomba S, Eckert E, Mihigo J, Bankineza E, Bah M, Diallo D, Gogue C, et al: **Rapid reduction of malaria transmission following the introduction of indoor residual spraying in previously unsprayed districts: an observational analysis of Mopti Region, Mali, in 2017.** *Malar J* 2020, **19:**340.

3. Programme National de Lutte contre le Paludisme (PNLP M: **Plan Strategique de lutte contre le paludisme.** pp. p. 1–1152013:p. 1–115.

4. Ateba FF, Febrero-Bande M, Sagara I, Sogoba N, Toure M, Sanogo D, Diarra A, Magdalene Ngitah A, Winch PJ, Shaffer JG, et al: **Predicting Malaria Transmission Dynamics in Dangassa, Mali: A Novel Approach Using Functional Generalized Additive Models.** *Int J Environ Res Public Health* 2020, **17**.

5. Cissoko M, Sagara I, Sankare MH, Dieng S, Guindo A, Doumbia Z, Allasseini B, Traore D, Fomba S, Bendiane MK, et al: **Geo-Epidemiology of Malaria at the Health Area Level, Dire Health District, Mali, 2013-2017.** *Int J Environ Res Public Health* 2020, **17**.

6. Diakalia KD, C.; Ogobara, D.: **An epidemiological profile of malaria in Mali. A report prepared for the Ministry of Health, Mali.** (The Roll Back Malaria Partnership and the Department for International Development U ed. pp. p. 88: PNLP, MRTC and INFORM MALARIA; 2015:p. 88.

7. Yeka A, Gasasira A, Mpimbaza A, Achan J, Nankabirwa J, Nsobya S, Staedke SG, Donnelly MJ, Wabwire-Mangen F, Talisuna A, et al: **Malaria in Uganda: challenges to control on the long road to elimination: I. Epidemiology and current control efforts.** *Acta Trop* 2012, **121:**184-195.

8. Shretta R, Liu J, Cotter C, Cohen J, Dolenz C, Makomva K, Newby G, Menard D, Phillips A, Tatarsky A, et al: **Malaria Elimination and Eradication.** In *Major Infectious Diseases.* Edited by rd, Holmes KK, Bertozzi S, Bloom BR, Jha P. Washington (DC)2017

9. **International Centers of Excellence for Malaria Research (ICEMR)** [<https://www.niaid.nih.gov/research/excellence-malaria-research>] Accessed on December 1st, 2020

10. **Earth Data** [<https://giovanni.gsfc.nasa.gov/giovanni/>]

11. Konate D, Diawara SI, Toure M, Diakite SAS, Guindo A, Traore K, Diarra A, Keita B, Thiam S, Keita M, et al: **Effect of routine seasonal malaria chemoprevention on malaria trends in children under 5 years in Dangassa, Mali.** *Malar J* 2020, **19:**137.

12. USAID/PMI: **PRESIDENT’S MALARIA INITIATIVE - MALARIA OPERATIONAL PLAN (MOP), MALI.** 2015.

13. WHO: **Microscopy examination of thick and thin blood films for identification of malaria parasites: Malaria microscopy standard operating procedure.** 2016.

14. M. T. Gillies DMB: **The Anophelinae of Africa south of the Sahara (Ethiopian Zoogeographical Region).** *Publications of the South African Institute for Medical Research* 1987, **54:**1-343.

15. Gillies M T and Botha De Meillon: *The Anophelinae of Africa south of the Sahara (Ethiopian zoogeographical region).* 2 edn: Johannesburg, South African Institute for Medical Research; 1968.

16. Beier JC, Perkins PV, Wirtz RA, Koros J, Diggs D, Gargan TP, 2nd, Koech DK: **Bloodmeal identification by direct enzyme-linked immunosorbent assay (ELISA), tested on Anopheles (Diptera: Culicidae) in Kenya.** *J Med Entomol* 1988, **25:**9-16.

17. Beier JC, Perkins PV, Wirtz RA, Whitmire RE, Mugambi M, Hockmeyer WT: **Field evaluation of an enzyme-linked immunosorbent assay (ELISA) for Plasmodium falciparum sporozoite detection in anopheline mosquitoes from Kenya.** *Am J Trop Med Hyg* 1987, **36:**459-468.

18. Team R: **RStudio: Integrated Development Environment for R. Boston, MA.** 2020.

19. **GraphPad Prism v.7 Software for Windows** [<https://www.graphpad.com/scientific-software/prism/>. ]

20. Coulibaly D, Travassos MA, Tolo Y, Laurens MB, Kone AK, Traore K, Sissoko M, Niangaly A, Diarra I, Daou M, et al: **Spatio-Temporal Dynamics of Asymptomatic Malaria: Bridging the Gap Between Annual Malaria Resurgences in a Sahelian Environment.** *Am J Trop Med Hyg* 2017, **97:**1761-1769.

21. Toure M, Sanogo D, Dembele S, Diawara SI, Oppfeldt K, Schioler KL, Haidara DB, Traore SF, Alifrangis M, Konradsen F, Doumbia S: **Seasonality and shift in age-specific malaria prevalence and incidence in Binko and Carriere villages close to the lake in Selingue, Mali.** *Malar J* 2016, **15:**219.

22. WHO: **Global Malaria Programme Seasonal Malaria Chemoprevention (SMC) for Plasmodium falciparum Malaria Control in Highly Seasonal Transmission Areas of the Sahel Sub-region in Africa. WHO Policy Recommendation. .** Geneva, Switzerland: World Health Organization2012.

23. Eisele TP, Bennett A, Silumbe K, Finn TP, Porter TR, Chalwe V, Hamainza B, Moonga H, Kooma E, Chizema Kawesha E, et al: **Impact of Four Rounds of Mass Drug Administration with Dihydroartemisinin-Piperaquine Implemented in Southern Province, Zambia.** *Am J Trop Med Hyg* 2020, **103:**7-18.

24. Brady OJ, Slater HC, Pemberton-Ross P, Wenger E, Maude RJ, Ghani AC, Penny MA, Gerardin J, White LJ, Chitnis N, et al: **Role of mass drug administration in elimination of Plasmodium falciparum malaria: a consensus modelling study.** *Lancet Glob Health* 2017, **5:**e680-e687.

25. Sonden K, Doumbo S, Hammar U, Vafa Homann M, Ongoiba A, Traore B, Bottai M, Crompton PD, Farnert A: **Asymptomatic Multiclonal Plasmodium falciparum Infections Carried Through the Dry Season Predict Protection Against Subsequent Clinical Malaria.** *J Infect Dis* 2015, **212:**608-616.

26. Lindblade KA, Steinhardt L, Samuels A, Kachur SP, Slutsker L: **The silent threat: asymptomatic parasitemia and malaria transmission.** *Expert Rev Anti Infect Ther* 2013, **11:**623-639.

27. Sogoba N, Doumbia S, Vounatsou P, Baber I, Keita M, Maiga M, Traore SF, Toure A, Dolo G, Smith T, Ribeiro JM: **Monitoring of larval habitats and mosquito densities in the Sudan savanna of Mali: implications for malaria vector control.** *Am J Trop Med Hyg* 2007, **77:**82-88.

28. Keita M, Baber I, Sogoba N, Maiga HM, Diallo M, Doumbia S, Traore SF: **Vectorial transmission of malaria in a village along the Niger River and its fishing hamlet (Kenieroba and Fourda, Mali).** *Bull Soc Pathol Exot* 2014, **107:**356-368.

29. Toure YT, Traore SF, Sankare O, Sow MY, Coulibaly A, Esposito F, Petrarca V: **Perennial transmission of malaria by the Anopheles gambiae complex in a north Sudan Savanna area of Mali.** *Med Vet Entomol* 1996, **10:**197-199.

30. Kelly-Hope LA, Hemingway J, McKenzie FE: **Environmental factors associated with the malaria vectors Anopheles gambiae and Anopheles funestus in Kenya.** *Malar J* 2009, **8:**268.

31. Mmbando AS, Kaindoa EW, Ngowo HS, Swai JK, Matowo NS, Kilalangongono M, Lingamba GP, Mgando JP, Namango IH, Okumu FO, Nelli L: **Fine-scale distribution of malaria mosquitoes biting or resting outside human dwellings in three low-altitude Tanzanian villages.** *PLoS One* 2021, **16:**e0245750.

32. Dolo A, Camara F, Poudiougo B, Toure A, Kouriba B, Bagayogo M, Sangare D, Diallo M, Bosman A, Modiano D, et al: **Epidemiology of malaria in a village of Sudanese savannah area in Mali (Bancoumana). 2. Entomo-parasitological and clinical study** *Bull Soc Pathol Exot* 2003, **96:**308-312.

33. Keita M, Baber I, Sogoba N, Maiga HM, Diallo M, Doumbia S, Traore SF: **[Vectorial transmission of malaria in a village along the Niger River and its fishing hamlet (Kenieroba and Fourda, Mali)].** *Bull Soc Pathol Exot* 2014, **107:**356-368.

34. Keïta K, Keïta, M., Sogoba, N., Yaro, A.S., Sangaré, D., Keïta, A., Cissé, B., et Traoré, S.F.: **Evaluation de l’impact d’une pulvérisation intra-domiciliaire en saison sèche sur la transmission du paludisme le long du fleuve Niger, Mali. .** *Antropo* 2017, **38:**87-97.

35. Griffin JT, Bhatt S, Sinka ME, Gething PW, Lynch M, Patouillard E, Shutes E, Newman RD, Alonso P, Cibulskis RE, Ghani AC: **Potential for reduction of burden and local elimination of malaria by reducing Plasmodium falciparum malaria transmission: a mathematical modelling study.** *Lancet Infect Dis* 2016, **16:**465-472.

36. Keita M, Sogoba N, Traore B, Kane F, Coulibaly B, Traore SF, Doumbia S: **Performance of pirimiphos-methyl based Indoor Residual Spraying on entomological parameters of malaria transmission in the pyrethroid resistance region of Koulikoro, Mali.** *Acta Trop* 2021, **216:**105820.

37. Rose-Wood A, Doumbia S, Traore B, Castro MC: **Trends in malaria morbidity among health care-seeking children under age five in Mopti and Sevare, Mali between 1998 and 2006.** *Malar J* 2010, **9:**319.
